# Supplementary material for: Effect of feeding type 2 diabetes mellitus rats with synbiotic yogurt sweetened with monk fruit extract on serum lipid levels and hepatic AMPK (5′ adenosine monophosphate-activated protein kinase) signaling pathway
Source: Royal Society of Chemistry journal article supplement (doi:10.1039/d0fo01860k), 2020-01-01

Table 1 Summary of raw sequencing data quality

| <b>Sample</b> | <b>Raw Reads</b> | <b>Bases</b> | <b>GC (%)</b> | <b>Q20</b> | <b>Q30</b> | <b>Avg.Quality</b> |
|---------------|------------------|--------------|---------------|------------|------------|--------------------|
| CY1           | 45408372         | 6.811(GB)    | 49.93%        | 98.47%     | 95.36%     | 36.225             |
| CY2           | 47347550         | 7.102(GB)    | 49.92%        | 98.48%     | 95.385%    | 36.235             |
| CY3           | 48055218         | 7.208(GB)    | 49.845%       | 98.47%     | 95.37%     | 36.23              |
| Con1          | 46469622         | 6.970(GB)    | 49.515%       | 98.47%     | 95.315%    | 36.225             |
| Con2          | 51043052         | 7.656(GB)    | 49.575%       | 98.54%     | 95.515%    | 36.255             |
| Con3          | 48788860         | 7.318(GB)    | 49.73%        | 98.47%     | 95.38%     | 36.23              |
| Dix1          | 44309810         | 6.646(GB)    | 49.795%       | 98.485%    | 95.375%    | 36.235             |
| Dix2          | 77508784         | 11.626(GB)   | 49.805%       | 98.5%      | 95.42%     | 36.24              |

|      |          |            |         |         |         |        |
|------|----------|------------|---------|---------|---------|--------|
| Dix3 | 70611074 | 10.592(GB) | 49.535% | 98.505% | 95.45%  | 36.245 |
| MYH1 | 46483284 | 6.972(GB)  | 49.645% | 98.495% | 95.39%  | 36.235 |
| MYH2 | 41433650 | 6.215(GB)  | 49.655% | 98.485% | 95.355% | 36.23  |
| MYH3 | 50955694 | 7.643(GB)  | 49.535% | 98.485% | 95.39%  | 36.235 |
| MYL1 | 47422064 | 7.113(GB)  | 49.8%   | 98.515% | 95.48%  | 36.245 |
| MYL2 | 44106830 | 6.616(GB)  | 49.935% | 98.33%  | 94.96%  | 36.16  |
| MYL3 | 46100168 | 6.915(GB)  | 49.63%  | 98.44%  | 95.235% | 36.21  |
| MYM1 | 46221026 | 6.933(GB)  | 49.84%  | 98.54%  | 95.545% | 36.26  |
| MYM2 | 47243940 | 7.087(GB)  | 50.045% | 98.58%  | 95.61%  | 36.27  |
| MYM3 | 45979358 | 6.897(GB)  | 49.81%  | 98.425% | 95.235% | 36.205 |

|       |          |           |         |         |         |        |
|-------|----------|-----------|---------|---------|---------|--------|
| SIDR1 | 48547242 | 7.282(GB) | 49.475% | 98.435% | 95.235% | 36.21  |
| SIDR2 | 41769560 | 6.265(GB) | 49.6%   | 98.535% | 95.495% | 36.255 |
| SIDR3 | 44804024 | 6.721(GB) | 49.635% | 98.445% | 95.245% | 36.21  |

---

Table 2 The number of DEGs in different groups VS diabetic rats

| Group       | Total DEGs | DEGs of up | DEGs of down |
|-------------|------------|------------|--------------|
| Con vs SIDR | 248        | 148        | 100          |
| CY vs SIDR  | 312        | 117        | 195          |
| MYH vs SIDR | 350        | 197        | 153          |
| MYM vs SIDR | 20         | 7          | 13           |
| MYL vs SIDR | 51         | 27         | 24           |
| Dix vs SIDR | 156        | 68         | 88           |

Fig. 1 (A): GO enrichment of all DEGs in CY group VS SIDR group. (B): GO enrichment of all DEGs in MY-H group VS SIDR group. BP: biological process; CC: cellular component; MF: molecular function.

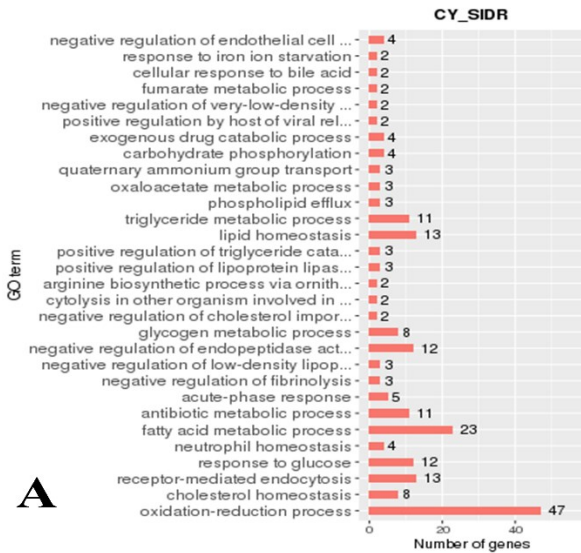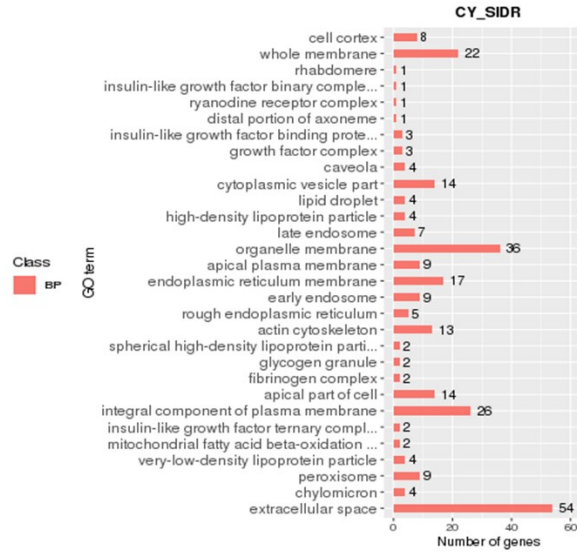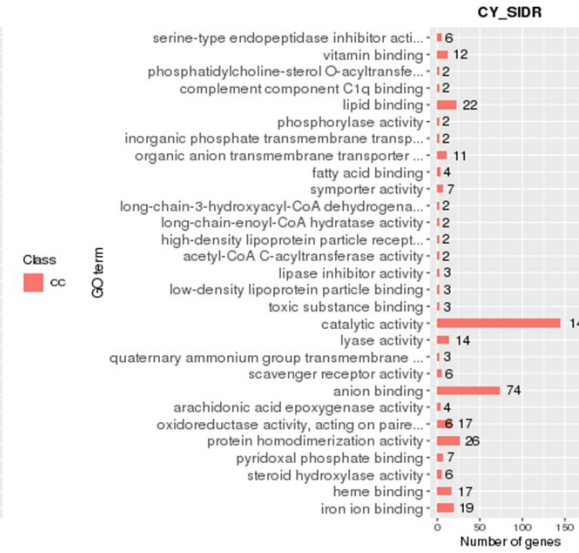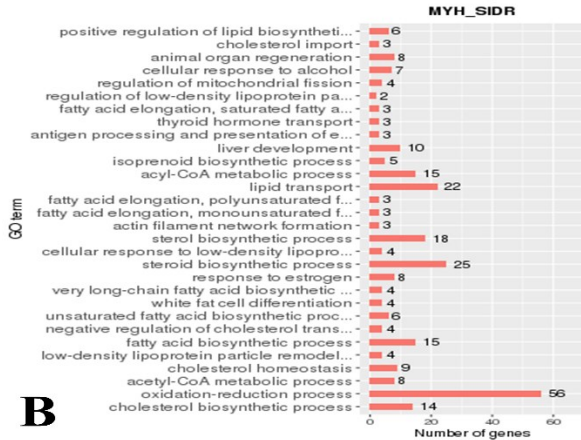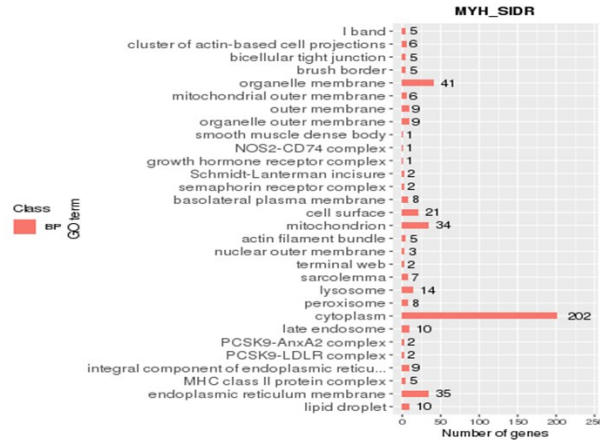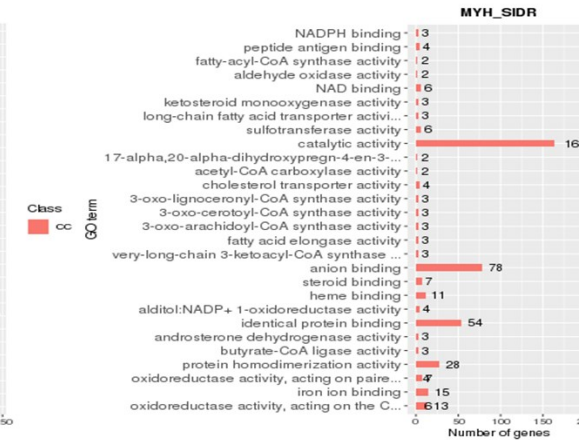

Supplement: d0fo01860k1.pdf [file d0fo01860k1.pdf]
